# Supplementary material for: High-efficiency red perovskite light-emitting diodes based on collaborative optimization of emission layer and transport layers
Source: Royal Society of Chemistry journal article supplement (doi:10.1039/d1tc02504j), 2021-01-01
Supplement: d1tc02504j1.pdf [file d1tc02504j1.pdf]

Supporting information

## **High-Efficiency Red Perovskite Light-emitting Diodes Based on Collaborative Optimization of Emission Layer and Transport Layers**

Hongfei Shi<sup>a</sup>, Zhibin Wang<sup>b</sup>, Huanyu Ma<sup>a</sup>, Haoran Jia<sup>a</sup>, Fuzhi Wang<sup>c</sup>, Cao Zou<sup>d</sup>, Siqian Hu<sup>e,\*</sup>, Hui Li<sup>a,\*</sup>, Zhan'ao Tan<sup>a,\*</sup>

a. Beijing Advanced Innovation Center for Soft Matter Science and Engineering,

Beijing University of Chemical Technology, Beijing 100029, China.

b. College of Physics and Energy, Fujian Normal University, Fuzhou 350117, China.

c. State Key Laboratory of Alternate Electrical Power System with Renewable Energy

Sources, North China Electric Power University, Beijing 102206, China.

d. College of Chemistry and Materials Engineering, Wenzhou University, Wenzhou 325027, China.

e. Key Laboratory of Optoelectronic Chemical Materials and Devices, Ministry of Education, Jiangnan University, Wuhan 430056, China.

Corresponding authors:

Email: tanzhanao@mail.buct.edu.cn (Zhan'ao Tan); hli@mail.buct.edu.cn (Hui Li);

husiqian@126.com (Siqian Hu)

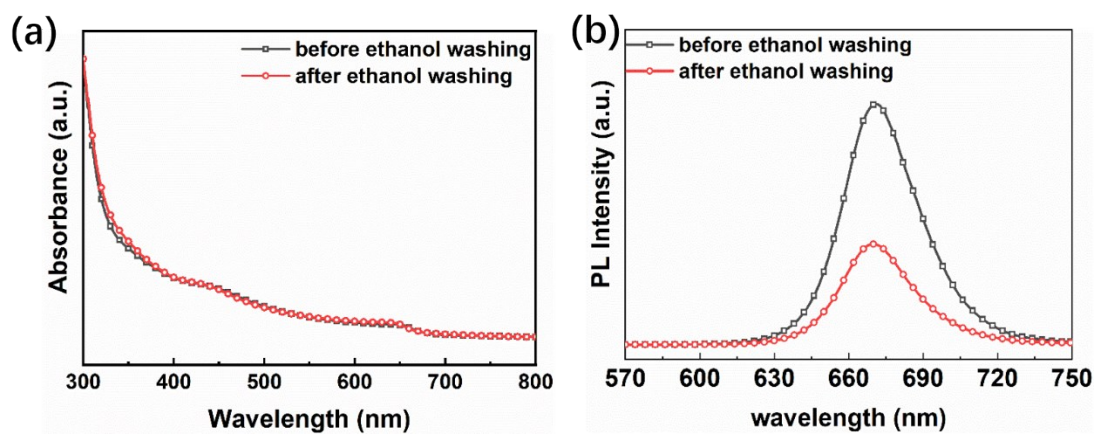

**Fig. S1.** Comparison of (a) the absorption and (b) PL spectra (500 nm excitation) of PEOX-35% modified CsPbI<sub>2.4</sub>Br<sub>0.6</sub> perovskite before and after ethanol washing.

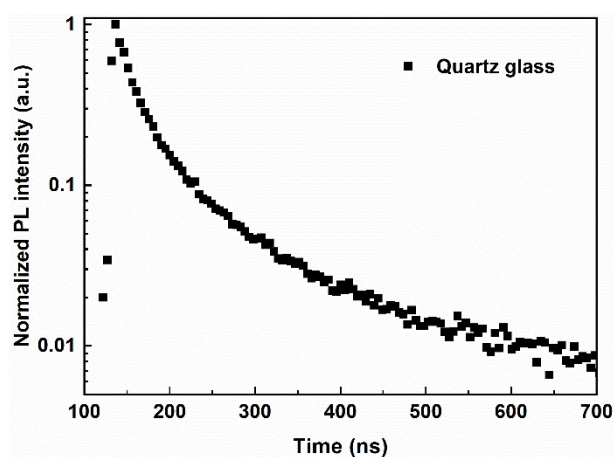

**Fig. S2.** TRPL spectra of perovskite film on quartz glass.

**Table S1.** Fitting data of TRPL spectra of perovskite film on quartz glass.

|                 | $\tau_1$ [ns]/ $f_1$ [%] | $\tau_2$ [ns]/ $f_2$ [%] | $\tau_3$ [ns]/ $f_3$ [%] | $\chi^2$ | $\tau_{\text{average}}$ [ns] |
|-----------------|--------------------------|--------------------------|--------------------------|----------|------------------------------|
| On quartz glass | 25.8/31.6                | 117/43.3                 | 867.2/25.1               | 1.197    | 131.362                      |

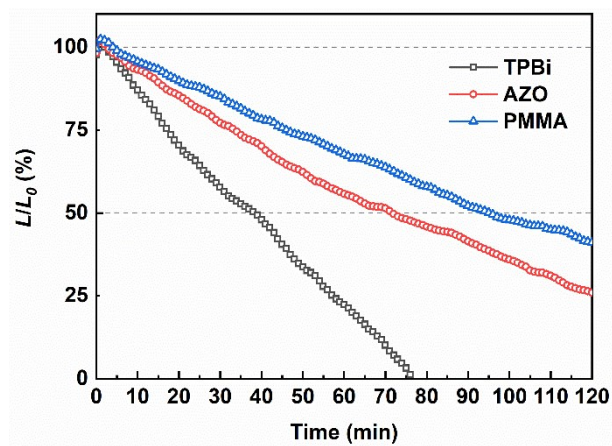

**Fig. S3.** Comparison of the operation stability measurement of PeLEDs with TPBi ETL, AZO ETL and AZO ETL/PMMA insertion layer, respectively (measured at the initial luminance of  $100 \text{ cd m}^{-2}$  without encapsulation in glovebox).
